# Supplementary material for: Raman spectroscopy-based sensitive, fast and reversible vapour phase detection of explosives adsorbed on metal–organic frameworks UiO-67
Source: Royal Society of Chemistry journal article supplement (doi:10.1039/d0nj04915h), 2021-01-01
Supplement: d0nj04915h1.pdf [file d0nj04915h1.pdf]

**Raman Spectroscopy-based Sensitive, Fast and Reversible Vapour Phase Detection of  
Explosives adsorbed on Metal-Organic Frameworks UiO-67**

Mousumi Sen Bishwas<sup>‡,†</sup>, Monika Malik<sup>‡,†</sup>, Pankaj Poddar<sup>‡,†\*</sup>

*‡Physical & Materials Chemistry Division, CSIR-National Chemical Laboratory, Pune -  
411008, India*

*†Academy of Scientific and Innovative Research (AcSIR), Sector 19, Kamla Nehru Nagar, Ghaziabad,  
Uttar Pradesh-201002, India*

**Synthesis of UiO-67-dccpy, MOF 1:** The MOF **1** used in this work was obtained from the work of Ghosh et al.<sup>1</sup> The synthesis protocol is discussed briefly where firstly the linker, 2-phenylpyridine-5,4' -dicarboxylic acid was synthesized by using the previously reported method.<sup>2</sup>

Then, the MOF **1** was synthesized by taking  $ZrCl_4$  and the linker in N,N-dimethylformamide (DMF, 4 mL) in a Teflon lined Parr stainless steel vessel (17 mL). The sealed vessel was placed in oven and heated at 120 °C for 24 h. The sample was cooled to room temperature, after which the white product was filtered and washed with DMF. The occluded solvent in MOF was then exchanged for methanol by dipping it in methanol for 3 days and replacing it with fresh methanol every 24 h. The guest free porous MOF **1** was obtained by heating the methanol exchanged MOF at 130 °C under vacuum for 24 h which was then used for further studies.

The powder XRD, TGA and fluorescence studies were done. The obtained MOF **1** showed fluorescence spectra when excited at 320 nm with the emission spectra in the range 330 nm-630 nm with maximum peak at 438 nm. The sizes of the pore windows as  $11.5 \text{ \AA} \times 23 \text{ \AA}$  were also mentioned.

**Table S1.** The comparison of different materials used for the vapour phase detection of explosives.

| S. No. | Materials                                                                                                                                                                    | Technique    | Analyte detected               | Time taken for the detection |
|--------|------------------------------------------------------------------------------------------------------------------------------------------------------------------------------|--------------|--------------------------------|------------------------------|
| 1      | Gold substrate                                                                                                                                                               | SERS         | Triacetone triperoxide         | 40 s <sup>3</sup>            |
| 2      | Fluorescent polymers                                                                                                                                                         | Fluorescence | 2,4-Dinitrotoluene             | 10 min <sup>4</sup>          |
| 3      | Gold nanoparticles                                                                                                                                                           | SERS         | 2,4-Dinitrotoluene             | 10 min <sup>5</sup>          |
| 4      | Thiophene-based polymer films                                                                                                                                                | Fluorescence | 2,4-Dinitrotoluene             | 5 min <sup>6</sup>           |
| 5      | Hetero-oligophenylene-Based Carbazole Derivatives                                                                                                                            | Fluorescence | Trinitrotoluene                | 30 min <sup>7</sup>          |
| 6      | Pentacenequinone derivative                                                                                                                                                  | Fluorescence | Trinitrophenol                 | 5 min <sup>8</sup>           |
| 7      | [Zn(ndc)(ted) <sub>0.5</sub> ]                                                                                                                                               | Fluorescence | Nitrobenzene                   | 10 min <sup>9</sup>          |
| 8      | [NH <sub>2</sub> (CH <sub>3</sub> ) <sub>2</sub> ][Cd <sub>6</sub> (L) <sub>4</sub> (DMF) <sub>6</sub> (HCOO)]                                                               | Fluorescence | Nitrobenzene                   | 11 min <sup>10</sup>         |
| 9      | Triphenylamine derivative                                                                                                                                                    | Fluorescence | Trinitrophenol                 | 1 min <sup>11</sup>          |
| 10     | [Tb(L')(OH)].x(H <sub>2</sub> O)]                                                                                                                                            | Fluorescence | Nitrobenzene                   | 10 min <sup>12</sup>         |
| 11     | [Zn(dcbpy)(DMF)].DMF                                                                                                                                                         | Fluorescence | 2,3-Dimethyl-2,3-dinitrobutane | 5 min <sup>13</sup>          |
| 12     | Polysiloxane-Modified Tetraphenylethene                                                                                                                                      | Fluorescence | Trinitrotoluene                | 10 min <sup>14</sup>         |
| 13     | Silver nanocubes                                                                                                                                                             | SERS         | 2,4-Dinitrotoluene             | 3 min <sup>15</sup>          |
| 14     | Zr <sub>6</sub> (sdba) <sub>4</sub> (μ <sub>3</sub> -O) <sub>4</sub> (μ <sub>3</sub> -OH) <sub>4</sub> (HCOO) <sub>2</sub> (OH) <sub>2</sub> (H <sub>2</sub> O) <sub>2</sub> | Fluorescence | Nitrobenzene                   | 30 min <sup>16</sup>         |
| 15     | Zr <sub>6</sub> O <sub>4</sub> (OH) <sub>4</sub> (dcppy) <sub>6</sub>                                                                                                        | Raman        | Trinitrophenol                 | 30 s (this work)             |

ndc = 2,6-naphthalenedicarboxylic acid; ted = triethylenediamine; DMF = N,N-dimethyl formamide; L= 2,4,6-tris[1-(3-carboxylphenoxy)methyl]mesitylene; L'= 5-(4-carboxyphenyl) pyridine-2-carboxylate; dcbpy= 2,2'-bipyridine-4,4'-dicarboxylate; sdba= 4,4'-sulfonyl dibenzoate; dcpy is 2-phenylpyridine-5,4'-dicarboxylate; SERS= surfaced-enhanced Raman spectroscopy

**Table S2.** The comparison of present work on the reversibility conditions with previously reported work.

| S. No. | Materials                                                                                                                                                                    | Analyte detected                                      | Temperature for reusability | Time taken for heating |
|--------|------------------------------------------------------------------------------------------------------------------------------------------------------------------------------|-------------------------------------------------------|-----------------------------|------------------------|
| 1      | [Zn <sub>2</sub> (bpdc) <sub>2</sub> (bpee)]                                                                                                                                 | 2,4-Dinitrotoluene and 2,3-dimethyl-2,3-dinitrobutane | 150 °C <sup>17</sup>        | 1 min                  |
| 2      | Polycarbazole polymer                                                                                                                                                        | Trinitrotoluene                                       | 45 °C <sup>18</sup>         | 3 h                    |
| 3      | [NH <sub>2</sub> (CH <sub>3</sub> ) <sub>2</sub> ][Cd <sub>6</sub> (L) <sub>4</sub> (DMF) <sub>6</sub> (HCOO)]                                                               | Nitrobenzene                                          | 50 °C <sup>10</sup>         | 30 min                 |
| 4      | [Tb(L')(OH)].x(H <sub>2</sub> O)]                                                                                                                                            | Nitrobenzene                                          | 150 °C <sup>12</sup>        | 30 min                 |
| 5      | Polysiloxane-Modified Tetraphenylethene                                                                                                                                      | Trinitrotoluene                                       | 40 °C <sup>14</sup>         | 8 h                    |
| 6      | Zr <sub>6</sub> (sdba) <sub>4</sub> (μ <sub>3</sub> -O) <sub>4</sub> (μ <sub>3</sub> -OH) <sub>4</sub> (HCOO) <sub>2</sub> (OH) <sub>2</sub> (H <sub>2</sub> O) <sub>2</sub> | Nitrobenzene                                          | 100 °C <sup>16</sup>        | -                      |
| 7      | Zr <sub>6</sub> O <sub>4</sub> (OH) <sub>4</sub> (dcppy) <sub>6</sub>                                                                                                        | Trinitrophenol                                        | 80 °C (this work)           | 5 min                  |

bpdc=4,4'-biphenyldicarboxylate; bpee=1,2-bipyridylethene; DMF = N,N-dimethyl formamide; L'= 5-(4-carboxyphenyl) pyridine-2-carboxylate; sdba= 4,4'-sulfonyl dibenzoate; dcppy is 2-phenylpyridine-5,4'-dicarboxylate

## References

- (1) Nagarkar, S. S.; Desai, A. V.; Ghosh, S. K. A Fluorescent Metal–organic Framework for Highly Selective Detection of Nitro Explosives in the Aqueous Phase. *Chem. Commun.* **2014**, 50 (64), 8915–8918. <https://doi.org/10.1039/C4CC03053B>.
- (2) Dau, P. V.; Kim, M.; Garibay, S. J.; Münch, F. H. L.; Moore, C. E.; Cohen, S. M. Single-Atom Ligand Changes Affect Breathing in an Extended Metal–Organic Framework. *Inorg. Chem.* **2012**, 51 (10), 5671–5676. <https://doi.org/10.1021/ic202683s>.
- (3) Fang, X.; Ahmad, S. Detection of Explosive Vapour Using Surface-Enhanced Raman Spectroscopy. *Appl. Phys. B Lasers Opt.* **2009**, 97 (3), 723–726. <https://doi.org/10.1007/s00340-009-3644-3>.
- (4) Nguyen, H. H.; Li, X.; Wang, N.; Wang, Z. Y.; Ma, J.; Bock, W. J.; Ma, D. Fiber-Optic Detection of Explosives Using Readily Available Fluorescent Polymers. *Macromolecules* **2009**, 42 (4), 921–926. <https://doi.org/10.1021/ma802460q>.
- (5) Khaing Oo, M. K.; Chang, C.-F.; Sun, Y.; Fan, X. Rapid, Sensitive DNT Vapor Detection with UV-Assisted Photo-Chemically Synthesized Gold Nanoparticle SERS Substrates. *Analyst* **2011**, 136 (13), 2811. <https://doi.org/10.1039/c1an15110j>.
- (6) Nagarjuna, G.; Kumar, A.; Kokil, A.; Jadhav, K. G.; Yurt, S.; Kumar, J.; Venkataraman, D. Enhancing Sensing of Nitroaromatic Vapours by Thiophene-Based Polymer Films. *J. Mater. Chem.* **2011**, 21 (41), 16597. <https://doi.org/10.1039/c1jm12949j>.
- (7) Kumar, M.; Vij, V.; Bhalla, V. Vapor-Phase Detection of Trinitrotoluene by AIEE-Active Hetero-Oligophenylene-Based Carbazole Derivatives. *Langmuir* **2012**, 28 (33), 12417–12421. <https://doi.org/10.1021/la302309z>.
- (8) Bhalla, V.; Gupta, A.; Kumar, M.; Rao, D. S. S.; Prasad, S. K. Self-Assembled Pentacenequinone Derivative for Trace Detection of Picric Acid. *ACS Appl. Mater. Interfaces* **2013**, 5 (3), 672–679. <https://doi.org/10.1021/am302132h>.
- (9) Banerjee, D.; Hu, Z.; Pramanik, S.; Zhang, X.; Wang, H.; Li, J. Vapor Phase Detection of Nitroaromatic and Nitroaliphatic Explosives by Fluorescence Active Metal–organic Frameworks. *CrystEngComm* **2013**, 15 (45), 9745. <https://doi.org/10.1039/c3ce41680a>.
- (10) Tian, D.; Chen, R.-Y.; Xu, J.; Li, Y.-W.; Bu, X.-H. A Three-Dimensional Metal–organic Framework for Selective Sensing of Nitroaromatic Compounds. *APL Mater.* **2014**, 2 (12), 124111. <https://doi.org/10.1063/1.4904879>.
- (11) Wenfeng, L.; Hengchang, M.; Ziqiang, L. Self-Assembled Triphenylamine Derivative for Trace Detection of Picric Acid. *RSC Adv.* **2014**, 4 (74), 39351–39358. <https://doi.org/10.1039/C4RA05843G>.

- (12) Qin, J.; Ma, B.; Liu, X.-F.; Lu, H.-L.; Dong, X.-Y.; Zang, S.-Q.; Hou, H. Aqueous- and Vapor-Phase Detection of Nitroaromatic Explosives by a Water-Stable Fluorescent Microporous MOF Directed by an Ionic Liquid. *J. Mater. Chem. A* **2015**, *3* (24), 12690–12697. <https://doi.org/10.1039/C5TA00322A>.
- (13) Jurcic, M.; Peveler, W. J.; Savory, C. N.; Scanlon, D. O.; Kenyon, A. J.; Parkin, I. P. The Vapour Phase Detection of Explosive Markers and Derivatives Using Two Fluorescent Metal–organic Frameworks. *J. Mater. Chem. A* **2015**, *3* (12), 6351–6359. <https://doi.org/10.1039/C4TA05638H>.
- (14) Li, Q.; Yang, Z.; Ren, Z.; Yan, S. Polysiloxane-Modified Tetraphenylethene: Synthesis, AIE Properties, and Sensor for Detecting Explosives. *Macromol. Rapid Commun.* **2016**, *37* (21), 1772–1779. <https://doi.org/10.1002/marc.201600378>.
- (15) Ben-Jaber, S.; Peveler, W. J.; Quesada-Cabrera, R.; Sol, C. W. O.; Papakonstantinou, I.; Parkin, I. P. Sensitive and Specific Detection of Explosives in Solution and Vapour by Surface-Enhanced Raman Spectroscopy on Silver Nanocubes. *Nanoscale* **2017**, *9* (42), 16459–16466. <https://doi.org/10.1039/C7NR05057G>.
- (16) Du, P.-Y.; Lustig, W. P.; Teat, S. J.; Gu, W.; Liu, X.; Li, J. A Robust Two-Dimensional Zirconium-Based Luminescent Coordination Polymer Built on a V-Shaped Dicarboxylate Ligand for Vapor Phase Sensing of Volatile Organic Compounds. *Chem. Commun.* **2018**, *54* (58), 8088–8091. <https://doi.org/10.1039/C8CC03496F>.
- (17) Lan, A.; Li, K.; Wu, H.; Olson, D. H.; Emge, T. J.; Ki, W.; Hong, M.; Li, J. A Luminescent Microporous Metal–Organic Framework for the Fast and Reversible Detection of High Explosives. *Angew. Chemie Int. Ed.* **2009**, *48* (13), 2334–2338. <https://doi.org/10.1002/anie.200804853>.
- (18) Nie, H.; Zhao, Y.; Zhang, M.; Ma, Y.; Baumgarten, M.; Müllen, K. Detection of TNT Explosives with a New Fluorescent Conjugated Polycarbazole Polymer. *Chem. Commun.* **2011**, *47* (4), 1234–1236. <https://doi.org/10.1039/C0CC03659E>.
